# Supplementary material for: A novel luminescent phosphor of a metal–organic framework with orange-red emission
Source: Royal Society of Chemistry journal article supplement (doi:10.1039/d1nj05218g), 2021-12-07
Supplement: d1nj05218g1.pdf [file d1nj05218g1.pdf]

## Supporting Information

# A novel luminescence phosphor of metal-organic framework with orange-red emission

Wei Meng <sup>a, †</sup>, Lin Sun <sup>b, †</sup>, Yuhao Long <sup>a</sup>, Qianping Wang <sup>a</sup>, Lian Zhou <sup>a, \*</sup>, Jun Zhang <sup>a, c, \*</sup>

<sup>a</sup> State Key Laboratory of Plateau Ecology and Agriculture, New Energy Photovoltaic Industry Research Center, Qinghai University, Xining 810016, P. R. China

<sup>b</sup> Henan Key Laboratory of Polyoxometalate Chemistry, Institute of Molecular and Crystal Engineering, College of Chemistry and Chemical Engineering, Henan University, Kaifeng, Henan 475004, P. R. China.

<sup>c</sup> School of Materials and Chemical Engineering, Anhui Jianzhu University, Hefei 230601, P. R. China

† These authors contributed equally to this work.

\* Corresponding authors (emails: zhoulianminai@126.com (L. Zhou); zhangjun@ahjzu.edu.cn (J. Zhang))

## 2. Experimental section

### 1. Synthesis:

A suspension of  $\text{Zn}(\text{NO}_3)_2 \cdot 6\text{H}_2\text{O}$  (0.1 mmol, 0.34 g), 4,4'-((1E,1'E)-(2,5-dibutoxy-1,4-phenylene)bis(ethene-2,1-diyl))dipyridine (abbreviated as DPBD, 0.01 mmol, 0.043g) and 2,5-dichloroterephthalic acid (abbreviated as  $\text{H}_2\text{DBTT}$ , 0.01 mmol, 0.047g) in 3 mL of DMF/ $\text{H}_2\text{O}$  (3:1, v/v) and a drop of HCl (2 mol/L) was sealed in a 10 mL Teflon-lined stainless steel autoclave and heated under autogenous pressure at 100°C for 72 h. After the autoclave was cooled to room temperature, orange block single crystals suitable for single-crystal X-ray crystallographic analysis were obtained. The resulting crystals were rinsed three times with DMF and dried at room temperature overnight for further characterization. Yield: 14.1 mg (13.2% based on DPBD). The phase purity was confirmed by powder X-ray diffraction (Figure S1 in Supporting Information).

### 2. Characterization

Thermogravimetric analysis (TGA) was checked on a Perkin-Elmer thermal analyzer under nitrogen with a heating rate of 10°C/min. Powder X-ray diffraction (PXRD) patterns were carried out on a Bruker D8 Advance instrument using  $\text{Cu K}\alpha$  radiation at room temperature ( $2\theta = 5\text{--}50^\circ$ , 0.1 s/deg). The photoluminescent spectra was executed on an Agilent Cary Eclipse Fluorescence spectrophotometer.

### 3. Crystallographic Data

A suitable single crystal of compound **1** was selected to carry out single-crystal X-ray diffraction data by a Bruker D8 venture diffractometer, using a photon CMOS-detector and graphite-monochromated Mo-K $\alpha$  radiation (0.71073 Å) at room temperature. After collection, the data reduction and absorption correction were executed by the SAINT<sup>1</sup> and SADABS<sup>2</sup> subprograms of APEX3<sup>3</sup> software package, respectively. Then, the structures were solved by dual space method using SHELXT<sup>4</sup> routine, and further refined by SHELXL<sup>5</sup> subprogram by full-matrix least squares on  $F^2$  under Olex2<sup>6</sup> program. All the hydrogen atoms were resided at their ideal geometric positions by theoretical calculation and refined isotropically using a riding model, and all non-hydrogen atoms were refined anisotropically. Summary of structural parameters and crystal data of compound **1** were given in Tables S1 to S3. Crystallographic data were deposited in the Cambridge Crystallographic Data Centre (CCDC No. 2114789).

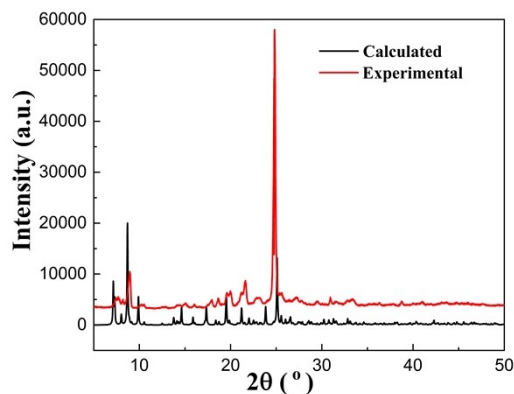

**Figure S1.** Powder X-ray diffraction (PXRD) patterns of compound **1**.

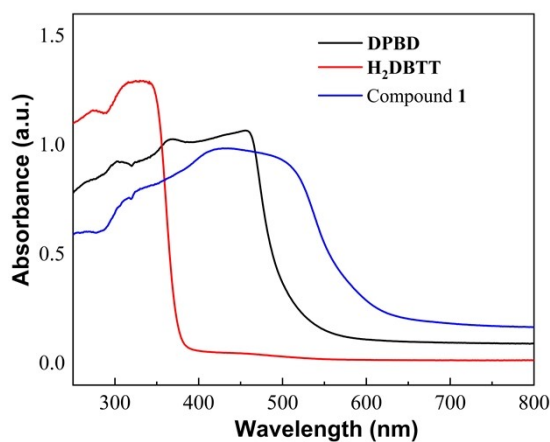

**Figure S2.** The UV-vis diffuse reflection spectra of compound **1** and free ligands of H<sub>2</sub>DBTT and DPBD.

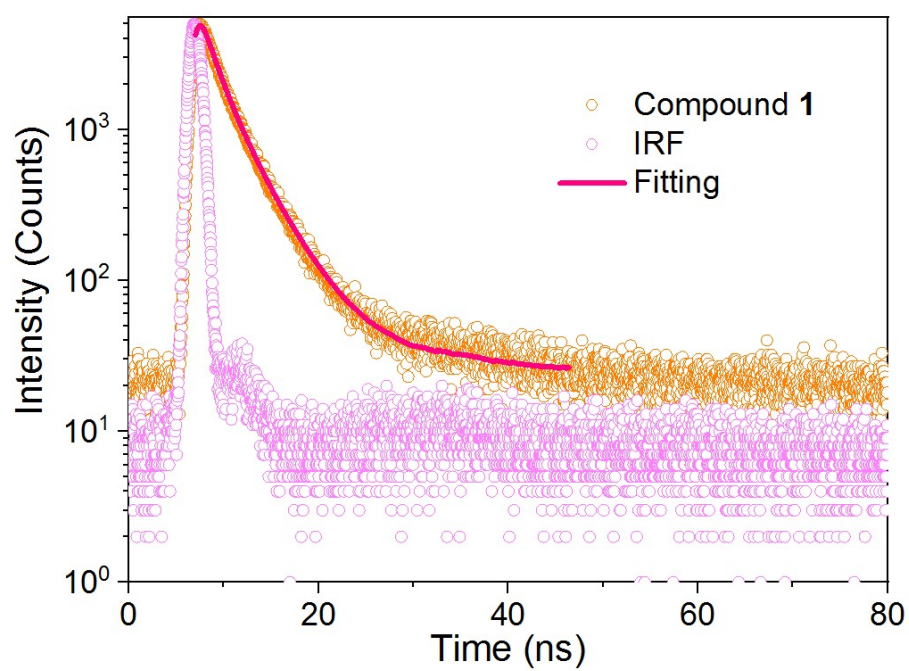

**Figure S3.** Fluorescence lifetimes of compound **1** derived from a least-square fit using double exponential function with internal reference.

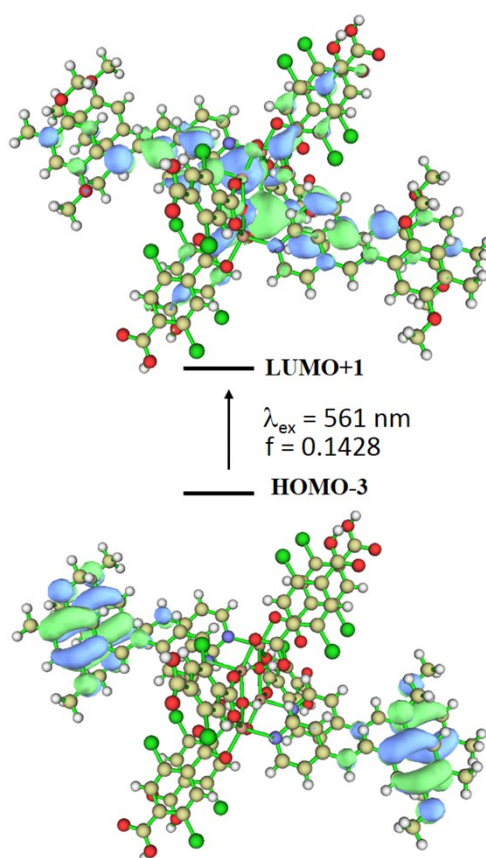

**Figure S4.** The calculated molecular orbitals of compound **1** drawn by Multiwfn<sup>7,8</sup> programs.



Table S1. Crystal data and structure refinement for compound **1**.

---

|                                   |                                                                                                               |                  |
|-----------------------------------|---------------------------------------------------------------------------------------------------------------|------------------|
| Empirical formula                 | C <sub>78.20</sub> H <sub>71.55</sub> Cl <sub>5.55</sub> N <sub>4.45</sub> O <sub>18.45</sub> Zn <sub>4</sub> |                  |
| Formula weight                    | 1827.15                                                                                                       |                  |
| Temperature                       | 153.15 K                                                                                                      |                  |
| Wavelength                        | 0.71073 Å                                                                                                     |                  |
| Crystal system                    | Triclinic                                                                                                     |                  |
| Space group                       | P-1                                                                                                           |                  |
| Unit cell dimensions              | a = 12.662(2) Å                                                                                               | α = 90.626(3)°.  |
|                                   | b = 13.459(2) Å                                                                                               | β = 96.747(3)°.  |
|                                   | c = 24.432(4) Å                                                                                               | γ = 112.981(3)°. |
| Volume                            | 3799.3(10) Å <sup>3</sup>                                                                                     |                  |
| Z                                 | 2                                                                                                             |                  |
| Density (calculated)              | 1.597 Mg/m <sup>3</sup>                                                                                       |                  |
| Absorption coefficient            | 1.518 mm <sup>-1</sup>                                                                                        |                  |
| F(000)                            | 1868                                                                                                          |                  |
| Crystal size                      | 0.15 x 0.14 x 0.11 mm <sup>3</sup>                                                                            |                  |
| Theta range for data collection   | 1.647 to 26.433°.                                                                                             |                  |
| Index ranges                      | -12 ≤ h ≤ 15, -16 ≤ k ≤ 16, -30 ≤ l ≤ 30                                                                      |                  |
| Reflections collected             | 21198                                                                                                         |                  |
| Independent reflections           | 15215 [R(int) = 0.0388]                                                                                       |                  |
| Completeness to theta = 25.242°   | 98.0 %                                                                                                        |                  |
| Absorption correction             | Semi-empirical from equivalents                                                                               |                  |
| Max. and min. transmission        | 0.7454 and 0.6057                                                                                             |                  |
| Refinement method                 | Full-matrix least-squares on F <sup>2</sup>                                                                   |                  |
| Data / restraints / parameters    | 15215 / 650 / 1101                                                                                            |                  |
| Goodness-of-fit on F <sup>2</sup> | 0.927                                                                                                         |                  |
| Final R indices [I > 2σ(I)]       | R1 = 0.0615, wR2 = 0.1445                                                                                     |                  |
| R indices (all data)              | R1 = 0.1267, wR2 = 0.1746                                                                                     |                  |
| Extinction coefficient            | n/a                                                                                                           |                  |
| Largest diff. peak and hole       | 1.367 and -0.752 e.Å <sup>-3</sup>                                                                            |                  |

---

Table S2. Bond lengths [ $\text{\AA}$ ] and angles [ $^\circ$ ] for compound **1**.

---

|                    |            |
|--------------------|------------|
| Zn(1)-O(2)         | 1.927(3)   |
| Zn(1)-O(3)         | 1.986(5)   |
| Zn(1)-O(5)         | 1.983(4)   |
| Zn(1)-O(19)        | 2.53(2)    |
| Zn(1)-O(23)        | 1.989(10)  |
| Zn(1)-N(4)         | 2.015(4)   |
| Zn(2)-O(2)         | 1.992(3)   |
| Zn(2)-O(2)#1       | 2.275(3)   |
| Zn(2)-O(13)#2      | 2.065(4)   |
| Zn(2)-O(14)        | 2.141(5)   |
| Zn(2)-O(16)#2      | 2.326(4)   |
| Zn(2)-O(24)        | 2.042(10)  |
| Zn(2)-N(1)#3       | 2.095(4)   |
| Zn(3)-O(1)         | 1.978(3)   |
| Zn(3)-O(1)#4       | 2.369(4)   |
| Zn(3)-O(7)         | 2.014(4)   |
| Zn(3)-O(9)         | 2.513(4)   |
| Zn(3)-O(18)        | 2.100(5)   |
| Zn(3)-O(22)        | 2.024(9)   |
| Zn(3)-N(3)#5       | 2.058(4)   |
| Zn(4)-O(1)         | 1.930(3)   |
| Zn(4)-O(6)         | 1.997(5)   |
| Zn(4)-O(8)         | 1.964(4)   |
| Zn(4)-O(15)        | 2.580(4)   |
| Zn(4)-O(21)        | 2.005(9)   |
| Zn(4)-N(2)         | 2.019(5)   |
| O(2)-Zn(1)-O(3)    | 115.8(2)   |
| O(2)-Zn(1)-O(5)    | 113.98(16) |
| O(2)-Zn(1)-O(19)   | 83.2(4)    |
| O(2)-Zn(1)-O(23)   | 108.5(10)  |
| O(2)-Zn(1)-N(4)    | 109.33(16) |
| O(5)-Zn(1)-O(3)    | 107.9(3)   |
| O(5)-Zn(1)-O(19)   | 54.1(3)    |
| O(5)-Zn(1)-O(23)   | 114.8(14)  |
| O(5)-Zn(1)-N(4)    | 105.20(17) |
| O(2)-Zn(2)-O(2)#1  | 77.59(13)  |
| O(2)-Zn(2)-O(13)#2 | 153.63(16) |

|                      |            |
|----------------------|------------|
| O(2)-Zn(2)-O(14)     | 95.3(3)    |
| O(2)#1-Zn(2)-O(16)#2 | 79.19(15)  |
| O(2)-Zn(2)-O(16)#2   | 96.43(15)  |
| O(2)-Zn(2)-O(24)     | 94.8(13)   |
| O(2)-Zn(2)-N(1)#3    | 106.84(16) |
| O(1)-Zn(3)-O(1)#4    | 77.49(13)  |
| O(1)-Zn(3)-O(7)      | 152.86(16) |
| O(1)#4-Zn(3)-O(9)    | 70.72(13)  |
| O(1)-Zn(3)-O(9)      | 97.27(13)  |
| O(1)-Zn(3)-O(18)     | 97.7(3)    |
| O(1)-Zn(3)-O(22)     | 94.1(8)    |
| O(1)-Zn(3)-N(3)#5    | 103.53(17) |
| O(1)-Zn(4)-O(6)      | 111.1(3)   |
| O(1)-Zn(4)-O(8)      | 124.10(16) |
| O(1)-Zn(4)-O(15)     | 85.34(14)  |
| O(1)-Zn(4)-O(21)     | 108.2(8)   |
| O(1)-Zn(4)-N(2)      | 103.92(16) |

Symmetry transformations used to generate equivalent atoms:

#1 -x+2,-y+1,-z+1    #2 x+1,y,z+1    #3 x+1,y-1,z  
 #4 -x+1,-y+1,-z    #5 x,y-1,z-1    #6 -x+1,-y,-z+1  
 #7 -x,-y,-z    #8 x-1,y,z-1    #9 x-1,y+1,z    #10 x,y+1,z+1

Table S3. Hydrogen bonds for compound **1**: [Å and °].

| D-H...A                | d(D-H) | d(H...A) | d(D...A)  | <(DHA) |
|------------------------|--------|----------|-----------|--------|
| C(1)-H(1A)...O(7)#10   | 0.95   | 2.56     | 3.168(7)  | 122.0  |
| C(5)-H(5)...O(15)#10   | 0.95   | 2.49     | 3.346(7)  | 149.7  |
| C(22)-H(22)...O(16)#2  | 0.95   | 2.49     | 3.416(7)  | 163.5  |
| C(49)-H(49)...O(9)     | 0.95   | 2.48     | 3.397(6)  | 163.6  |
| C(54)-H(54)...O(6)#11  | 0.95   | 2.43     | 3.311(10) | 153.9  |
| C(70)-H(70)...O(13)#10 | 0.95   | 2.48     | 3.110(7)  | 123.8  |
| C(71)-H(71)...O(17)#9  | 0.95   | 2.33     | 3.253(8)  | 164.2  |
| C(71)-H(71)...O(19)#9  | 0.95   | 2.58     | 3.417(15) | 147.4  |

Symmetry transformations used to generate equivalent atoms:

#1 -x+2,-y+1,-z+1    #2 x+1,y,z+1    #3 x+1,y-1,z

#4 -x+1,-y+1,-z    #5 x,y-1,z-1    #6 -x+1,-y,-z+1  
#7 -x,-y,-z    #8 x-1,y,z-1    #9 x-1,y+1,z    #10 x,y+1,z+1  
#11 -x,-y+1,-z

#### References:

1. Bruker, *SAINTE*, Bruker AXS Inc., Madison, Wisconsin, USA, 7.68 A edn., 2009.
2. Bruker, *SADABS*, Bruker AXS Inc., Madison, Wisconsin, USA, 2008/1 edn., 2008.
3. W. Madison, *Bruker APEX2 software*, Bruker AXS Inc., Fitchburg, WI, 2.0 - 1 edn., 2015.
4. G. M. Sheldrick, *Acta Crystallogr. A Found. Crystallogr.*, 2015, **71**, 3-8.
5. G. M. Sheldrick, *Acta Crystallogr. C Struct. Chem.*, 2015, **71**, 3-8.
6. O. V. Dolomanov, L. J. Bourhis, R. J. Gildea, J. A. K. Howard and H. Puschmann, *J. Appl. Crystallogr.*, 2009, **42**, 339-341.
7. T. Lu and F. Chen, *Acta Chim. Sinica*, 2011, **69**, 2393-2406.
8. M. Xiao and T. Lu, *J. Adv. Phys. Chem.*, 2015, **04**, 111-124.
